# Supplementary material for: Resistance gene enrichment sequencing (RenSeq) enables reannotation of the NB-LRR gene family from sequenced plant genomes and rapid mapping of resistance loci in segregating populations
Source: PubMed Central journal article supplement (PMC3935411; doi:10.1111/tpj.12307), 2013-10-08
Supplement: tpj0076-0530-sd1.pdf [file tpj0076-0530-sd1.pdf]

Jupe and Witek et al.  
Supporting Information

**Figure S1. Physical mapping position of all potato NB-LRR loci.**

All NB-LRR loci were mapped onto the twelve chromosomes of the reference potato clone DM. The underlying color code is as in (Jupe et al. 2012), and the RenSeq based newly identified NB-LRR loci are shown in purple. The chromosomes and locations are drawn to scale.

# DM NB-LRR genes

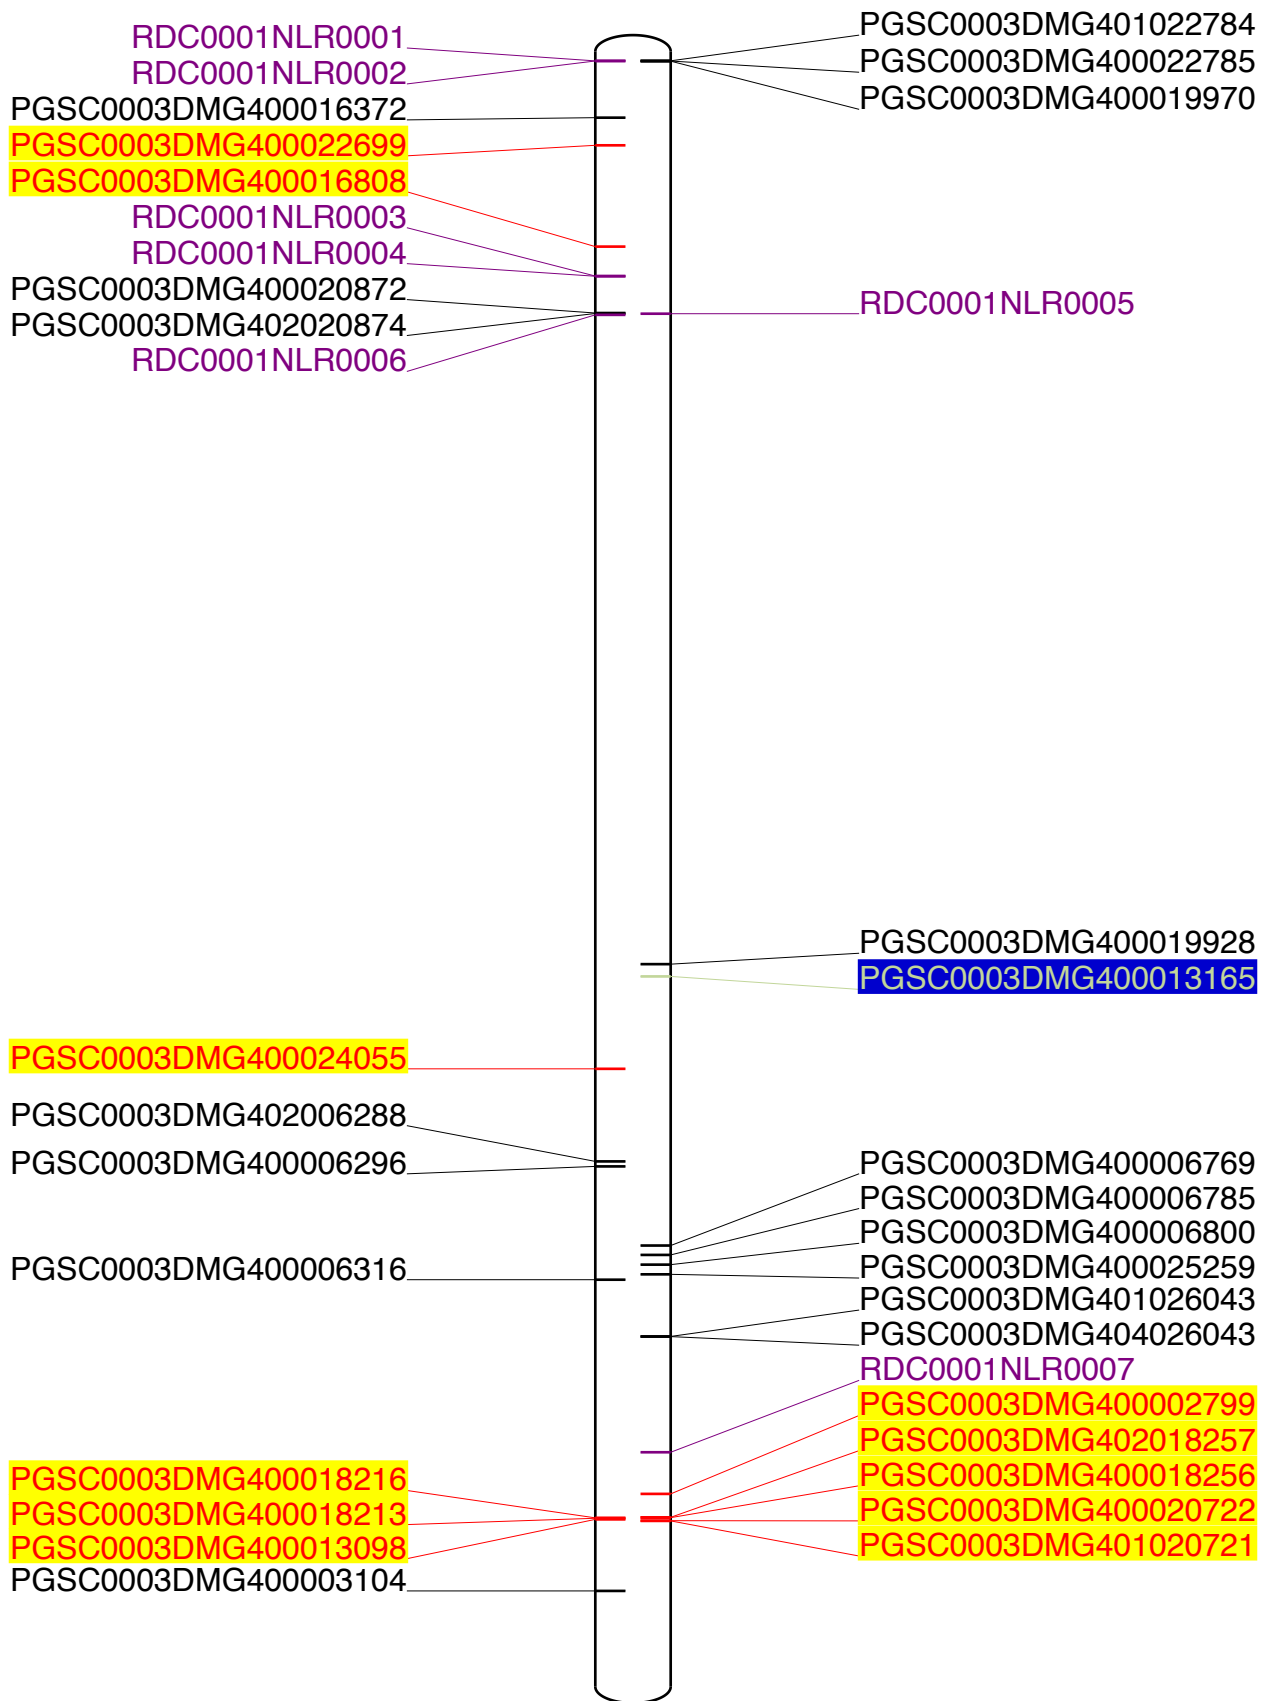

Chromosome 01

## DM NB-LRR genes

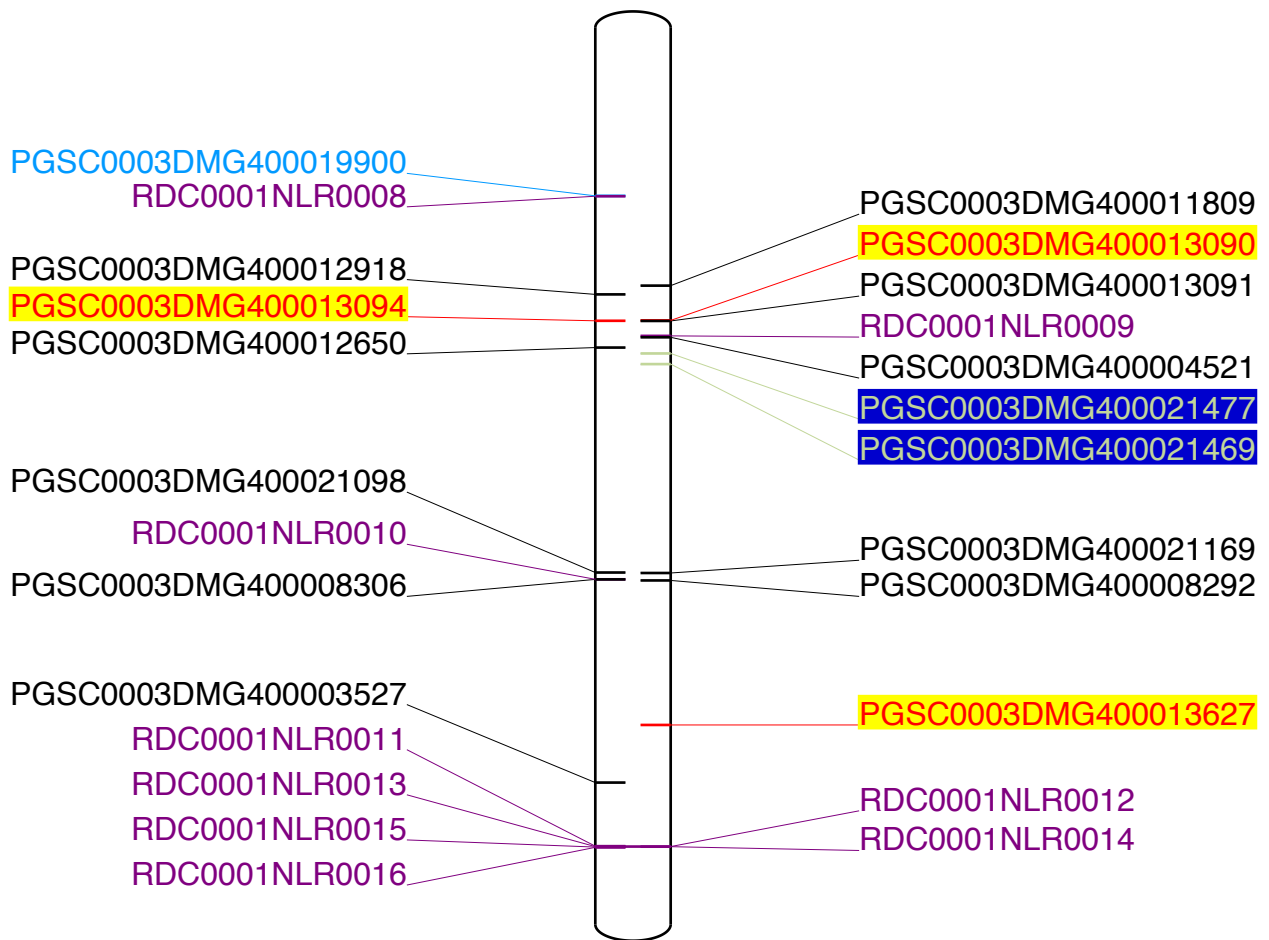

## Chromosome 02

# DM NB-LRR genes

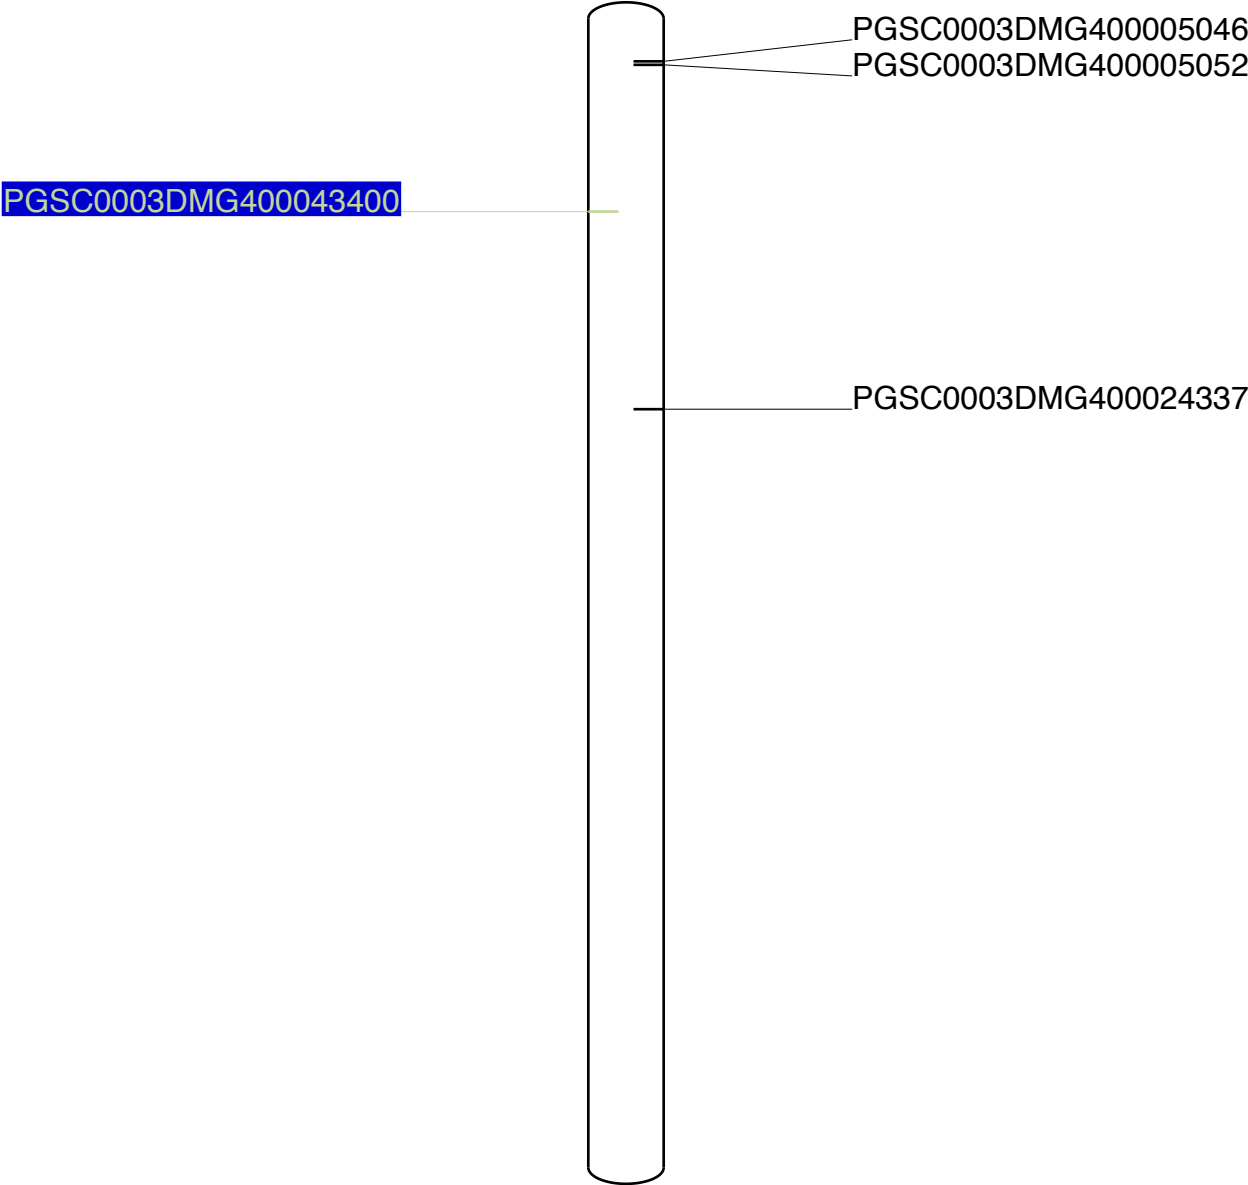

Chromosome 03

# DM NB-LRR genes

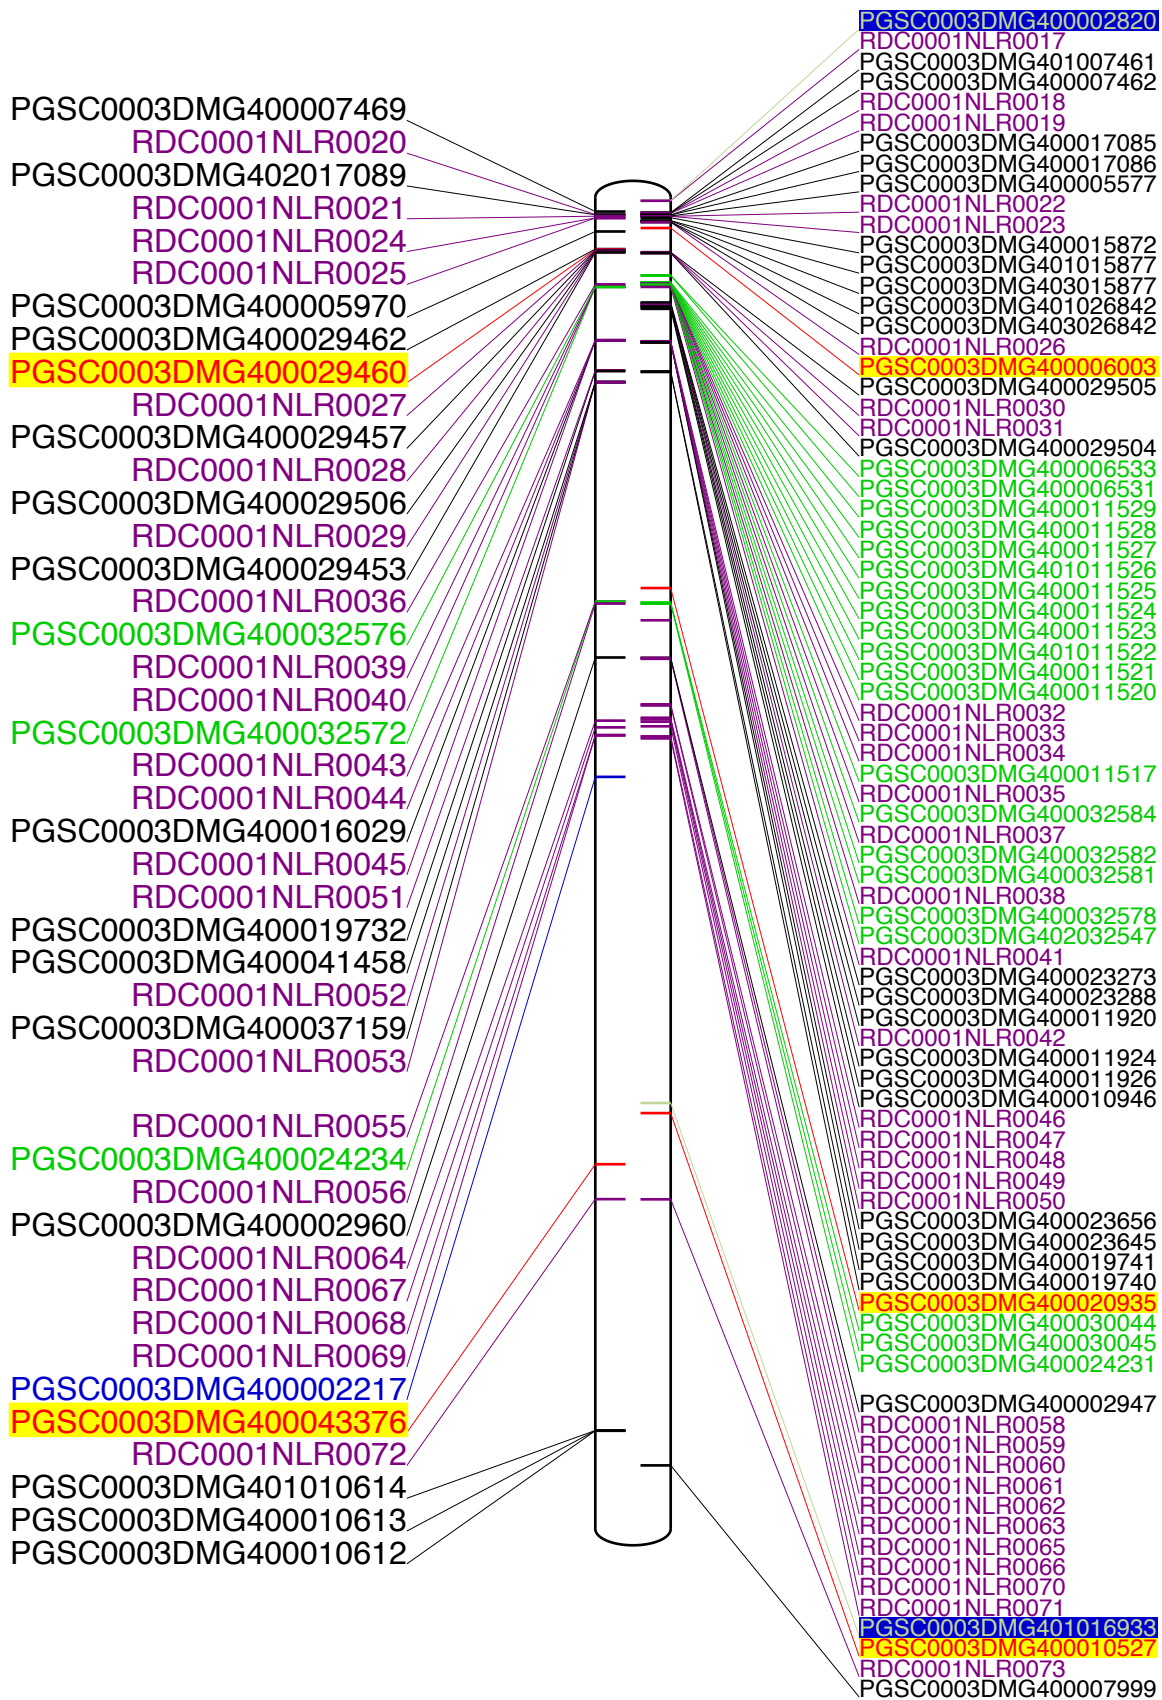

Chromosome 04

## DM NB-LRR genes

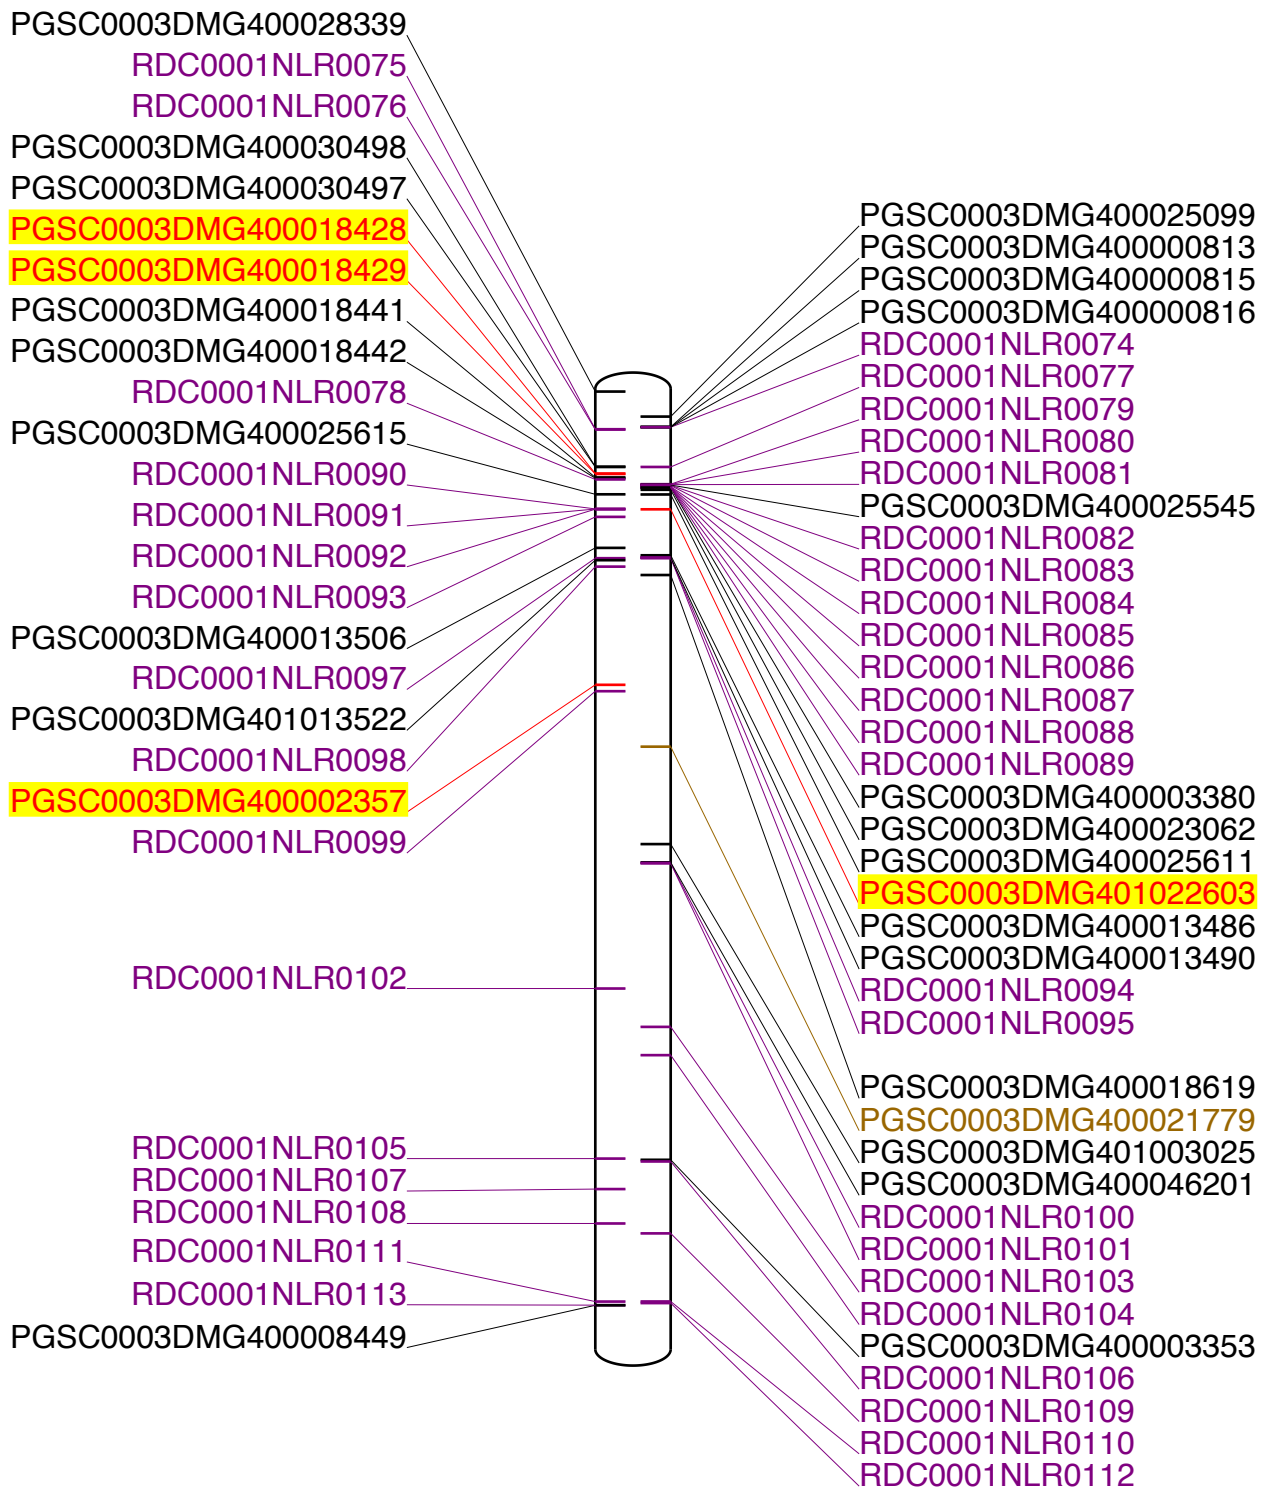

## Chromosome 05

# DM NB-LRR genes

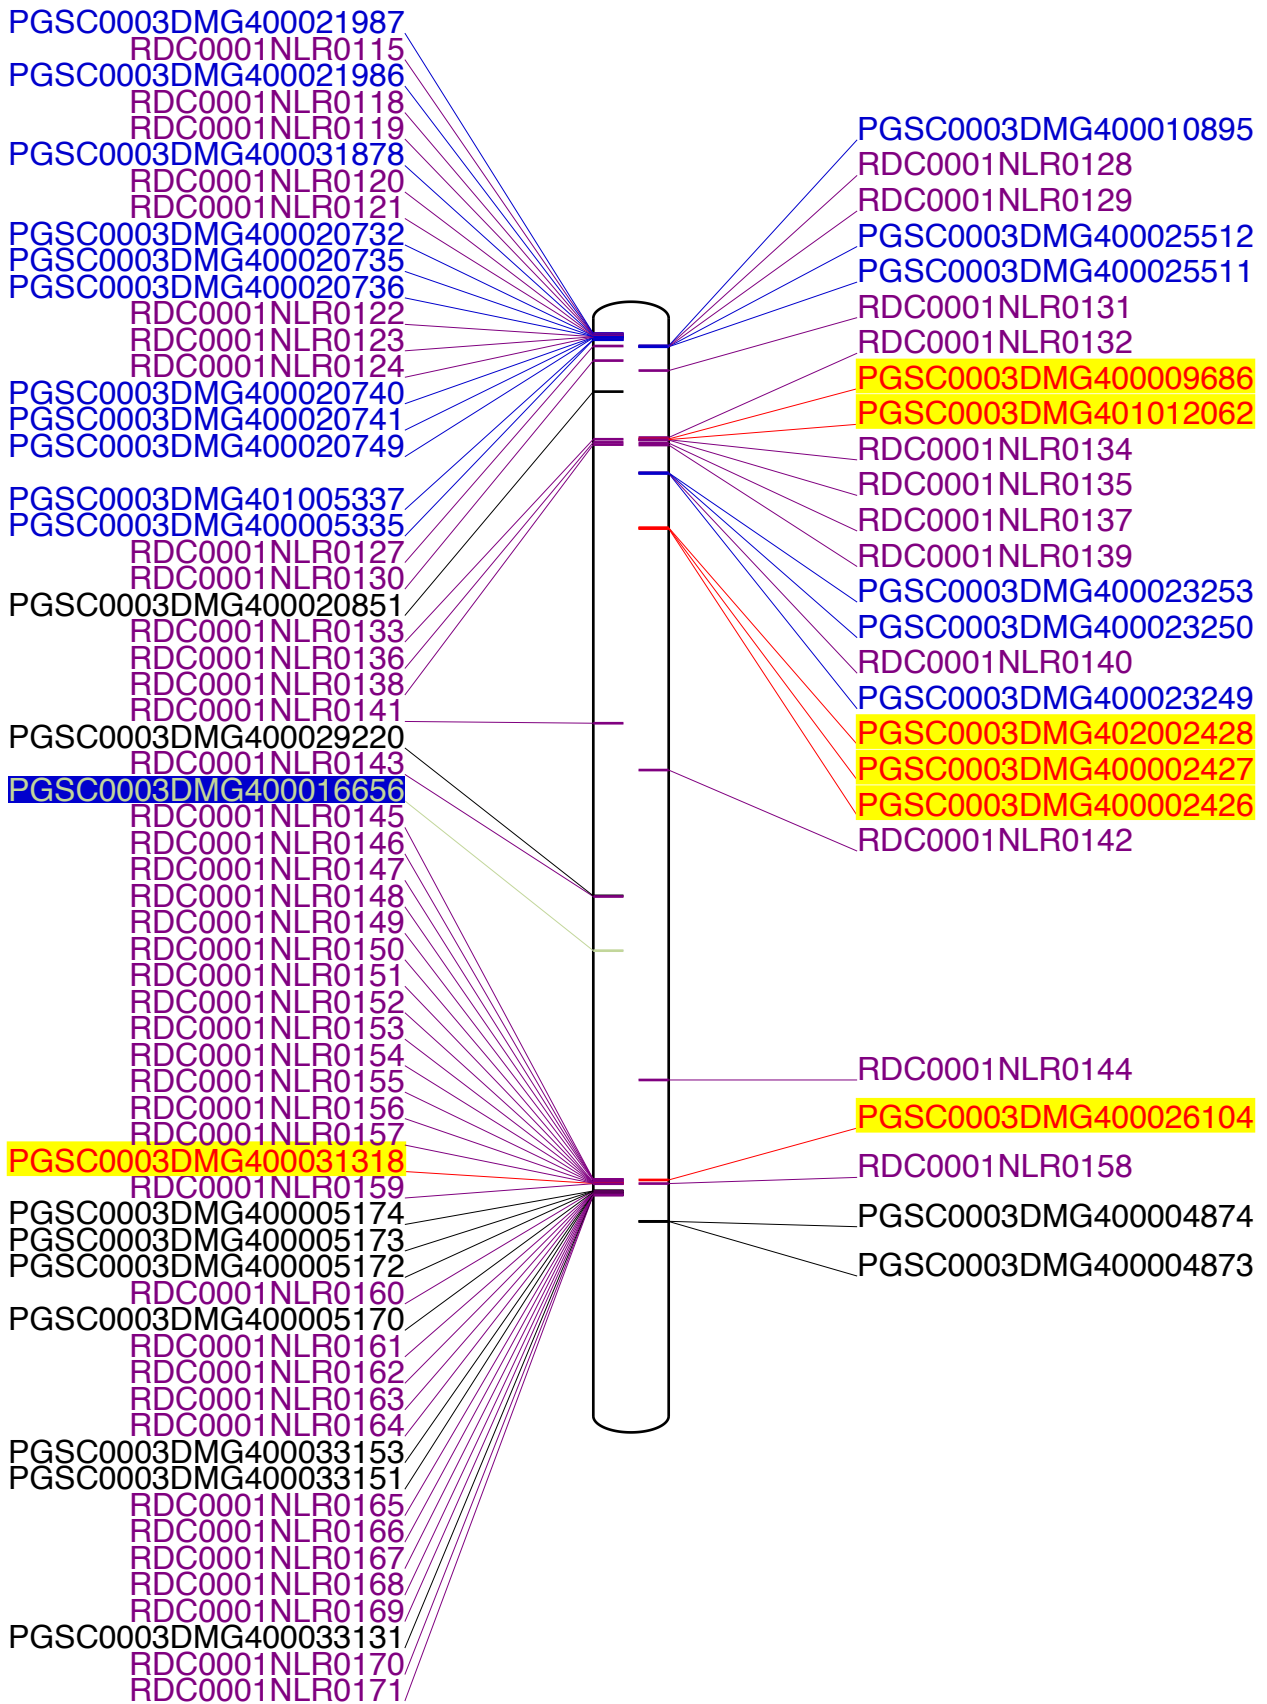

Chromosome 06

# DM NB-LRR genes

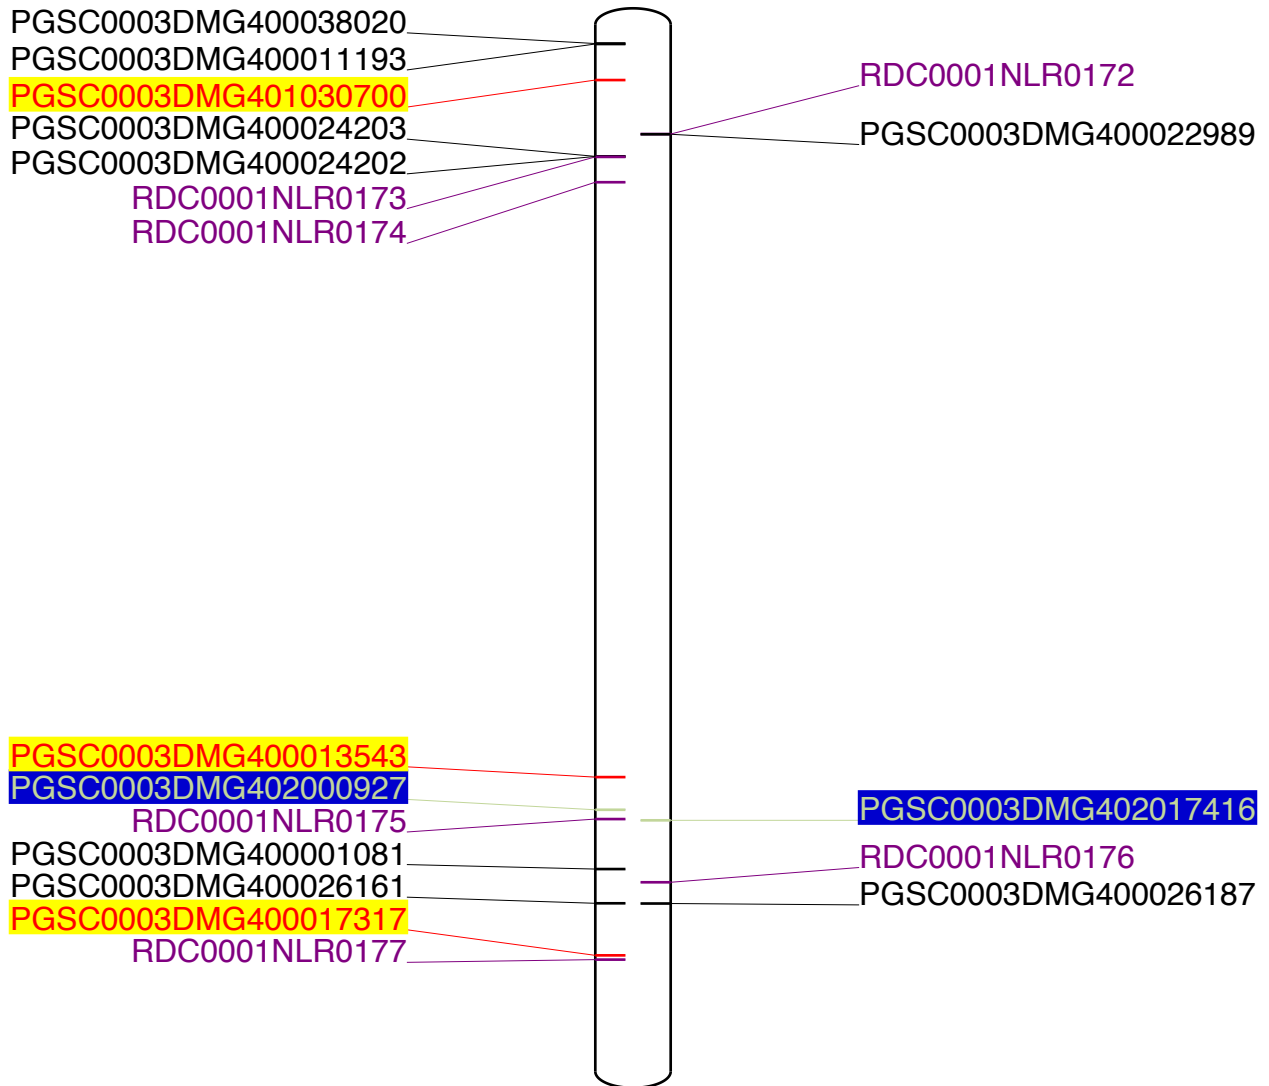

Chromosome 07



# DM NB-LRR genes

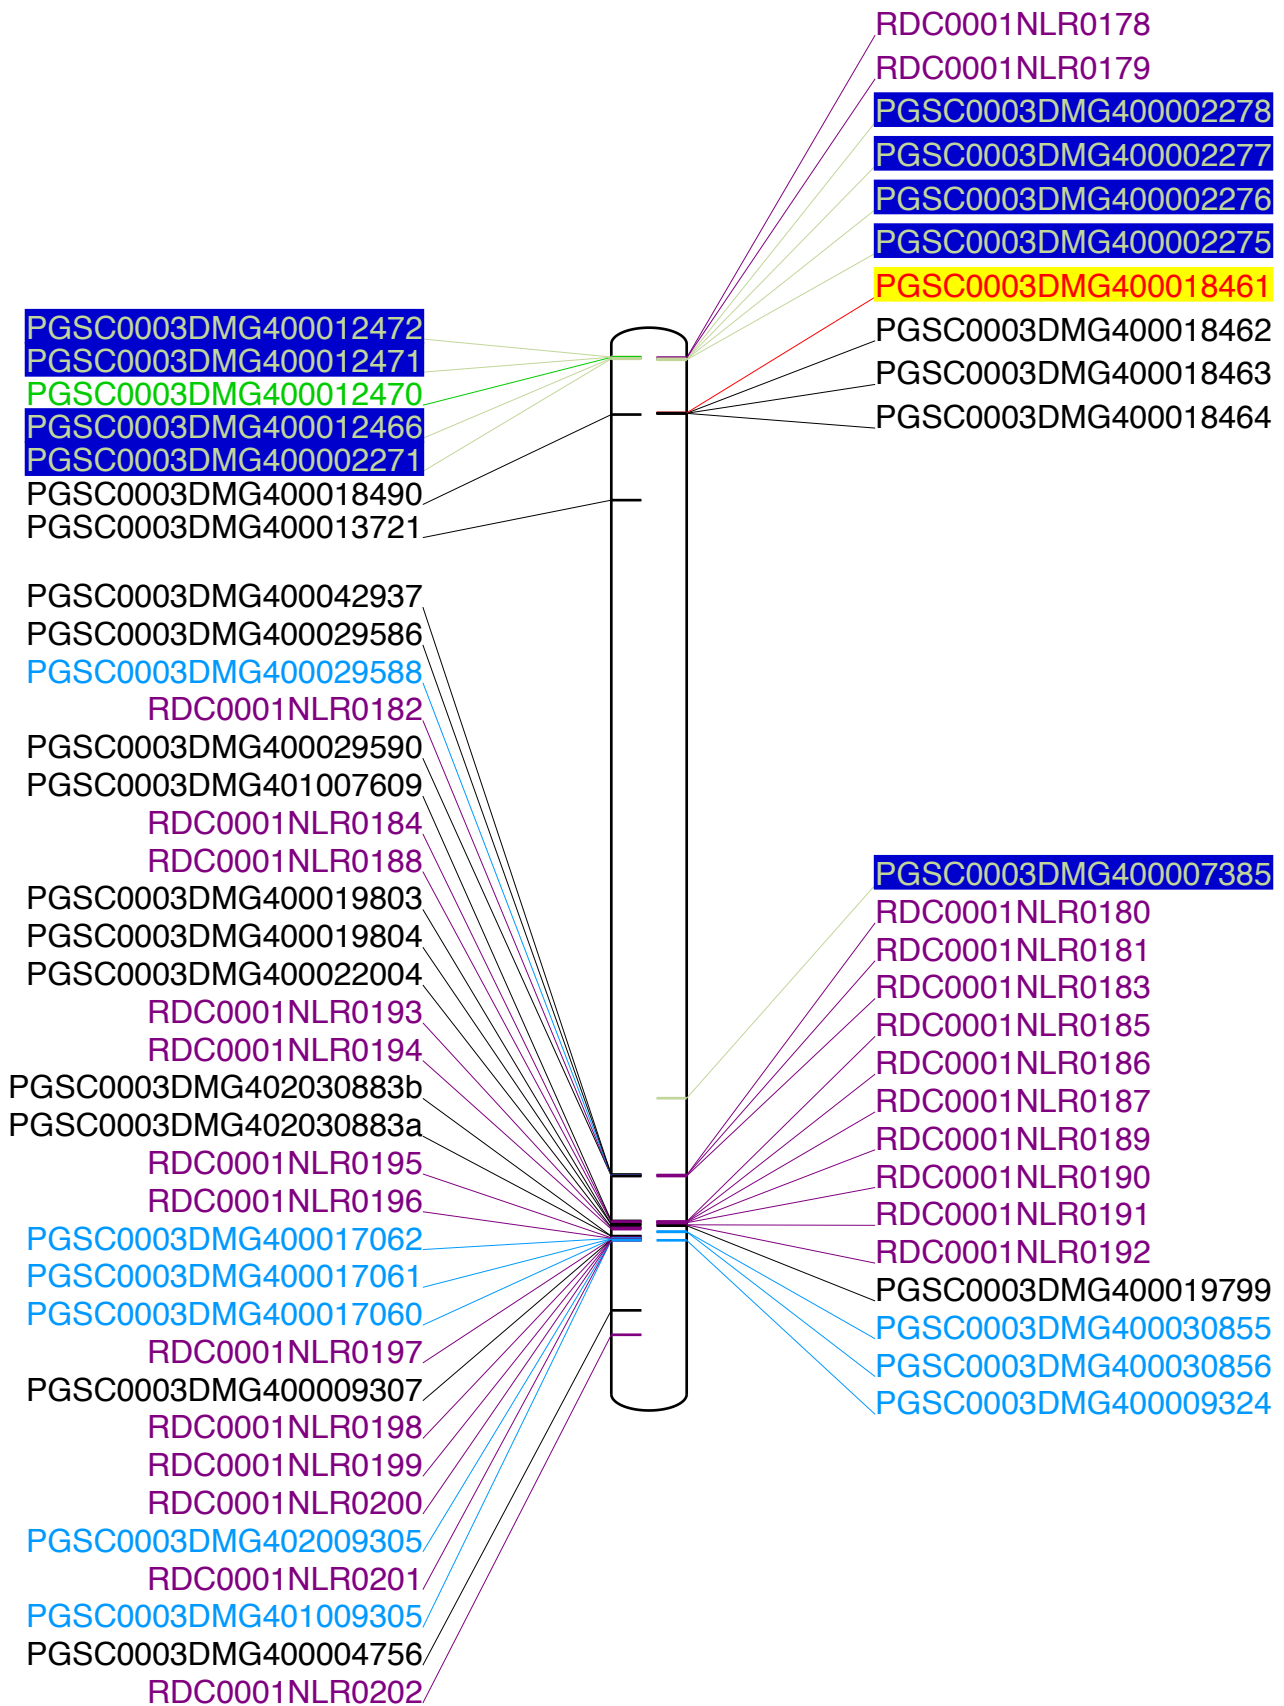

Chromosome 08

## DM NB-LRR genes

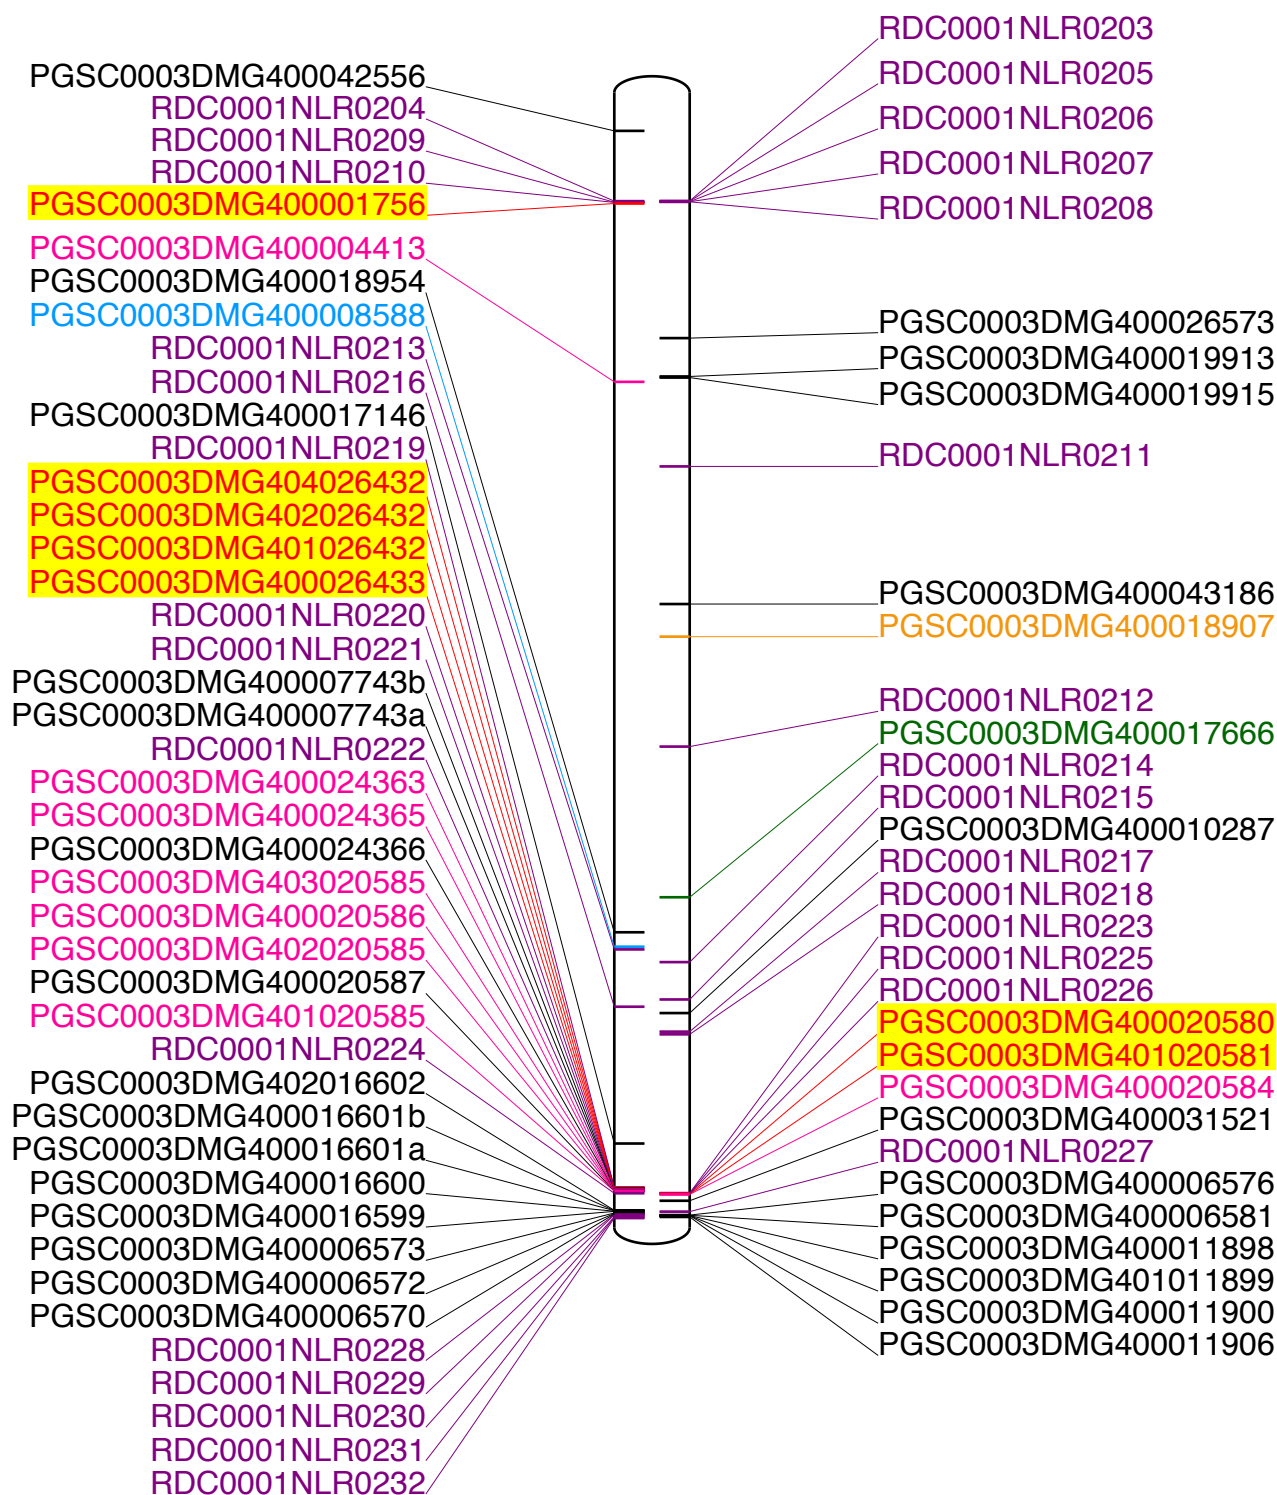

**Chromosome 09**

## DM NB-LRR genes

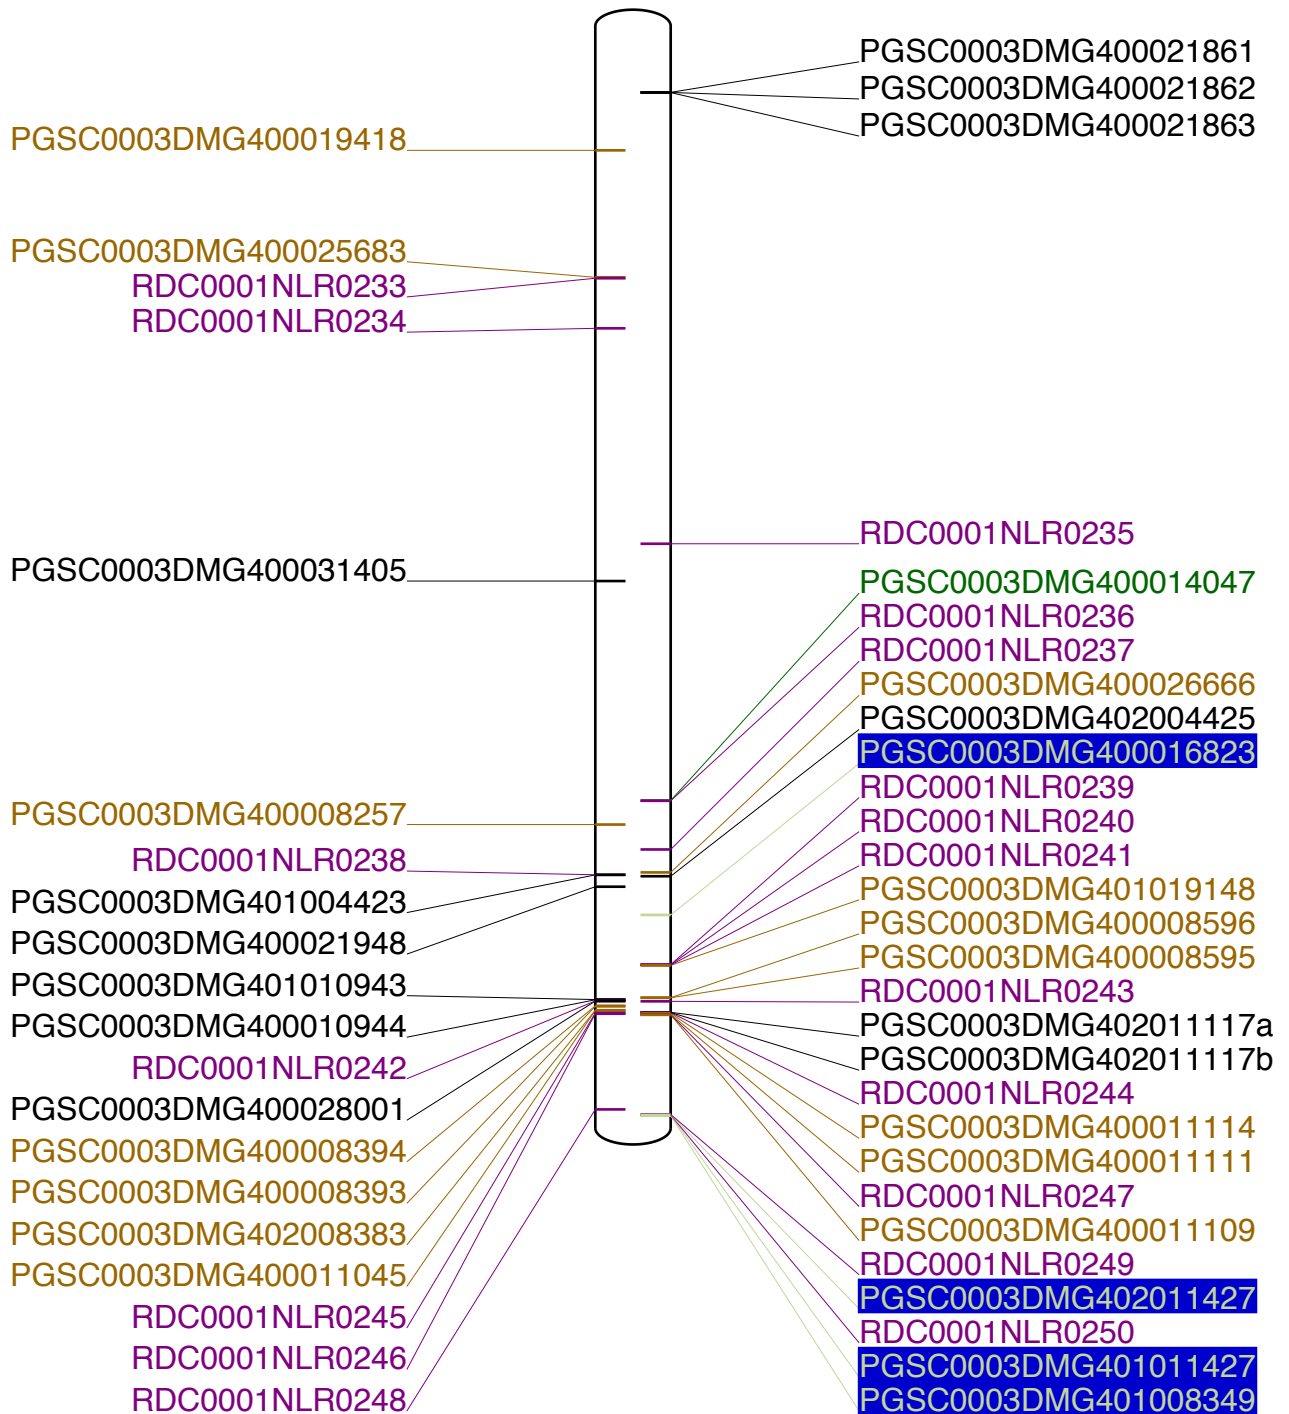

**Chromosome 10**

# DM NB-LRR genes

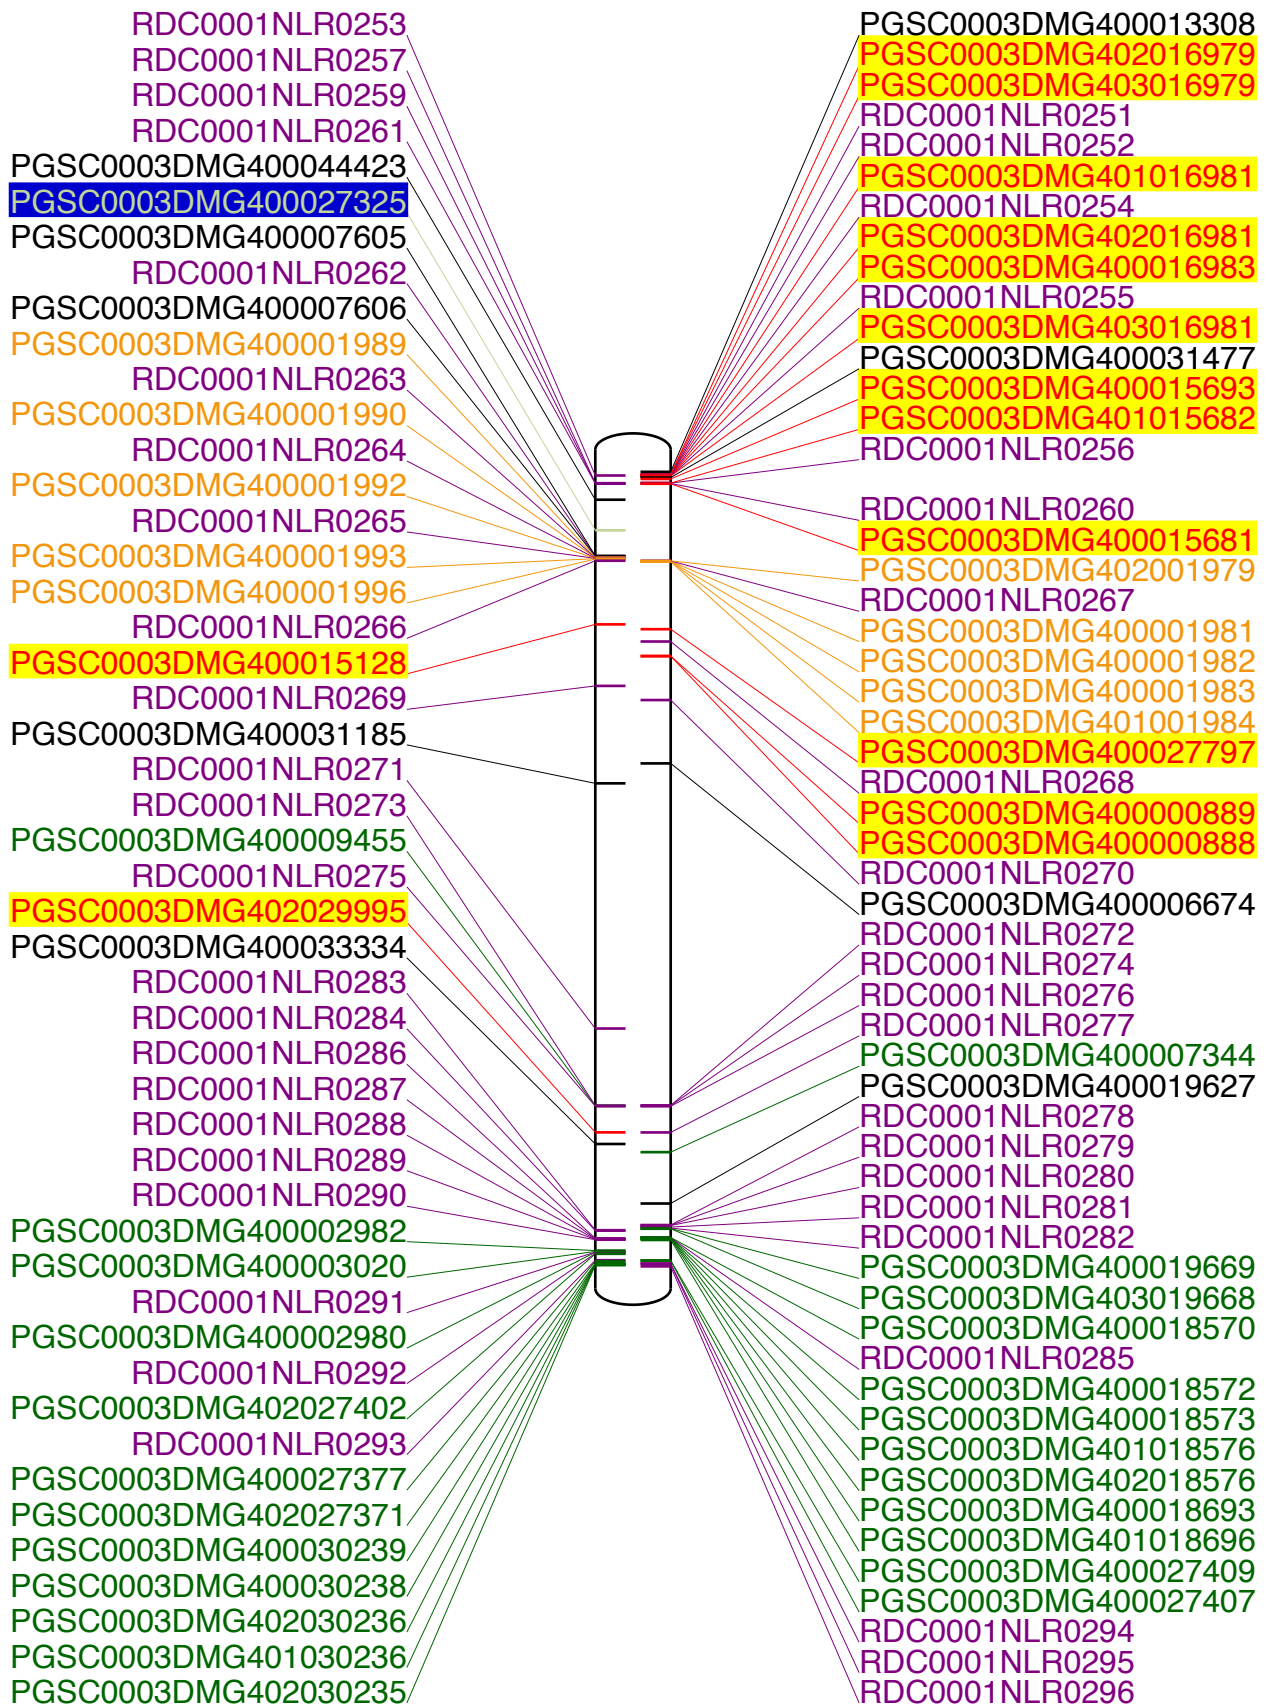

## Chromosome 11

# DM NB-LRR genes

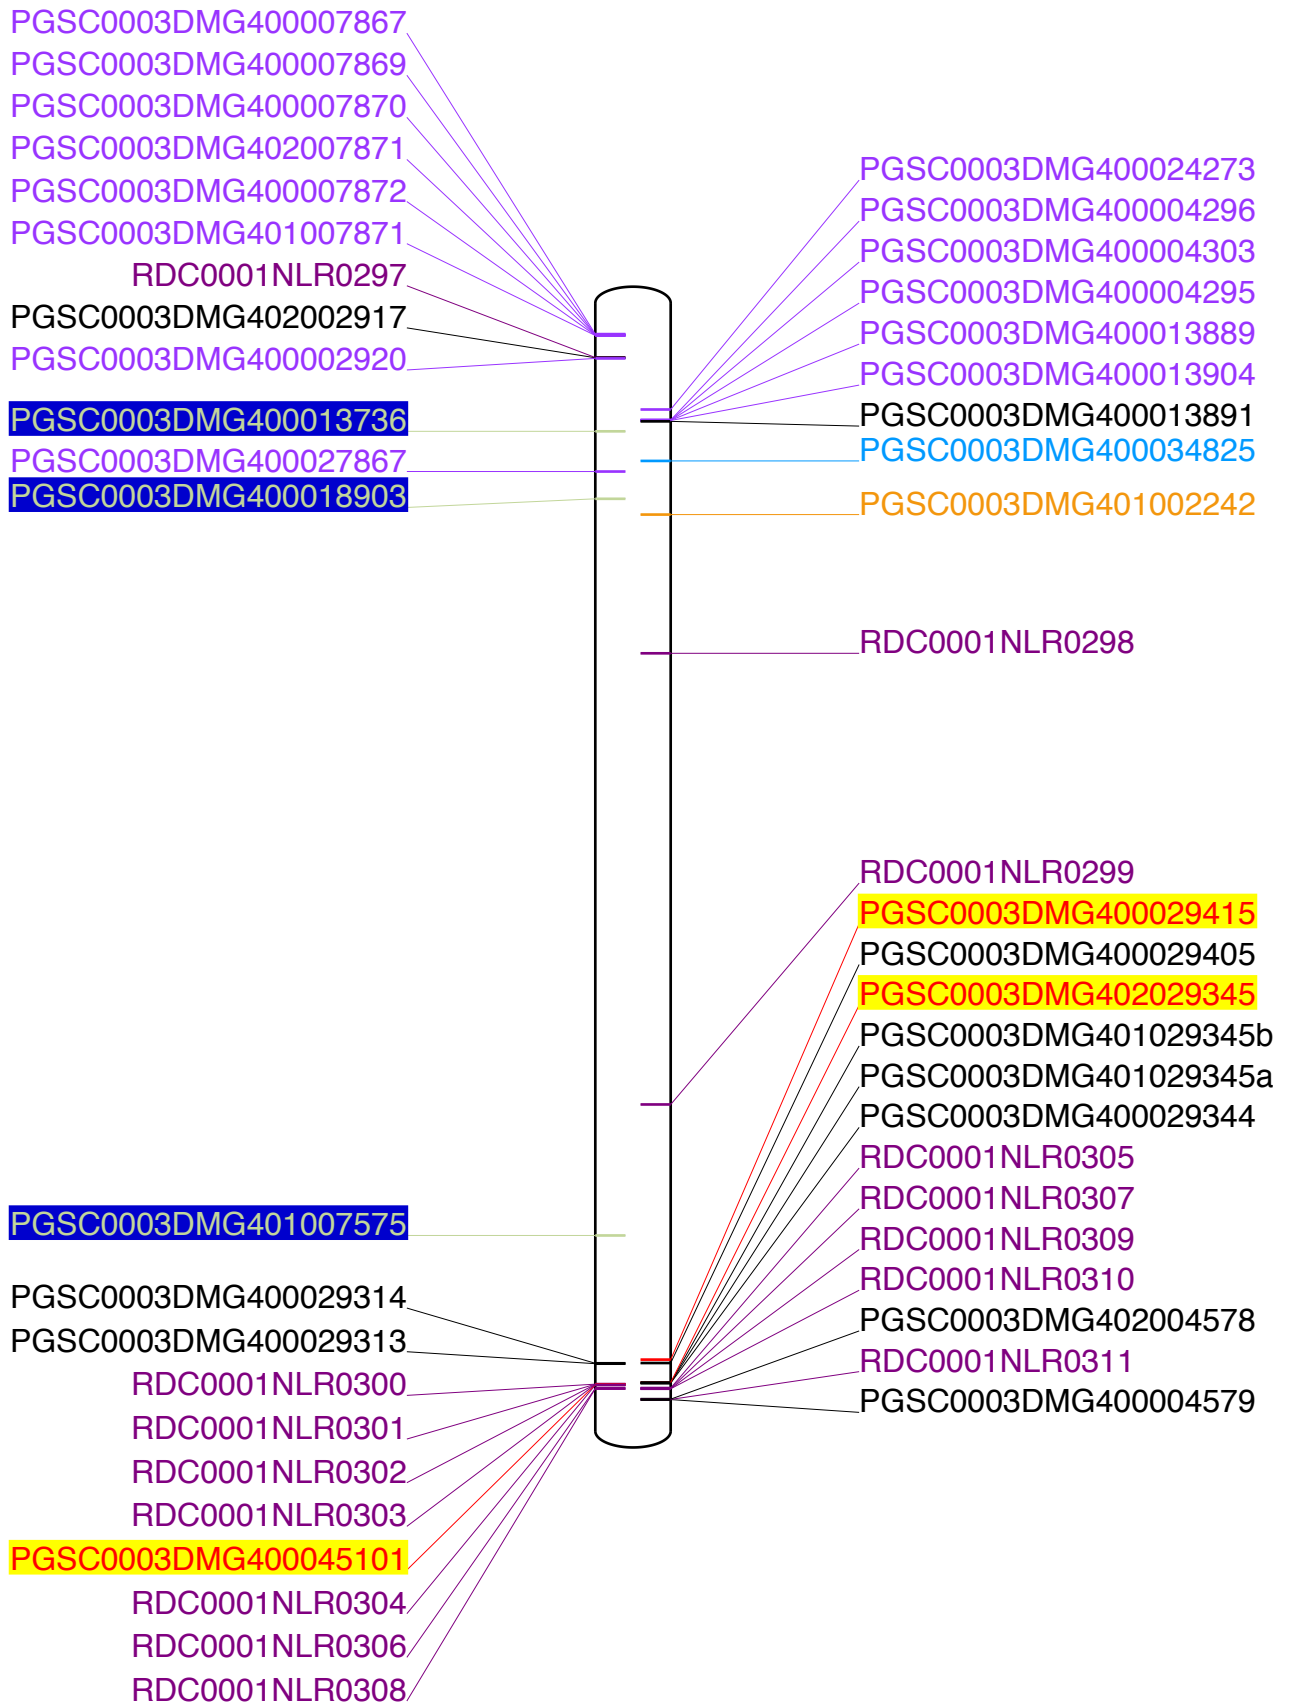

Chromosome 12
